# Supplementary material for: Colorimetric, electroanalytical and theoretical evaluation of the antioxidant activity of Syzygium aromaticum L., Origanum vulgare L., Mentha spicata L. and Eremanthus erythropappus M. essential oils, and their major constituents
Source: Royal Society of Chemistry journal article supplement (doi:10.1039/c8nj05893h), 2019-01-01
Supplement: c8nj05893h1.pdf [file c8nj05893h1.pdf]

Electronic Supplementary Information for

**New Journal of Chemistry**

Colorimetric, electroanalytical and theoretical evaluation of the antioxidant activity of  
some essential oils and their major constituents

Vanuzia Rodrigues Fernandes Ferreira,<sup>a</sup> Matheus P. Freitas,<sup>a</sup> Adelir Aparecida Saczk,<sup>a</sup>  
Fabiana Silva Felix,<sup>a</sup> Josué M. Silla,<sup>a</sup> Rafaela Magalhães Brandão,<sup>a</sup> Maria Luisa  
Teixeira,<sup>a</sup> and Maria das Graças Cardoso<sup>a\*</sup>

<sup>a</sup>Chemistry Department, University Federal of Lavras

**\*corresponding author:**

Dr<sup>a</sup>. Maria das Graças Cardoso  
University Federal of Lavras  
Chemistry Department  
37.200-000, Lavras, MG, Brazil.

**e-mail:** [mcardoso@dqi.ufla.br](mailto:mcardoso@dqi.ufla.br)

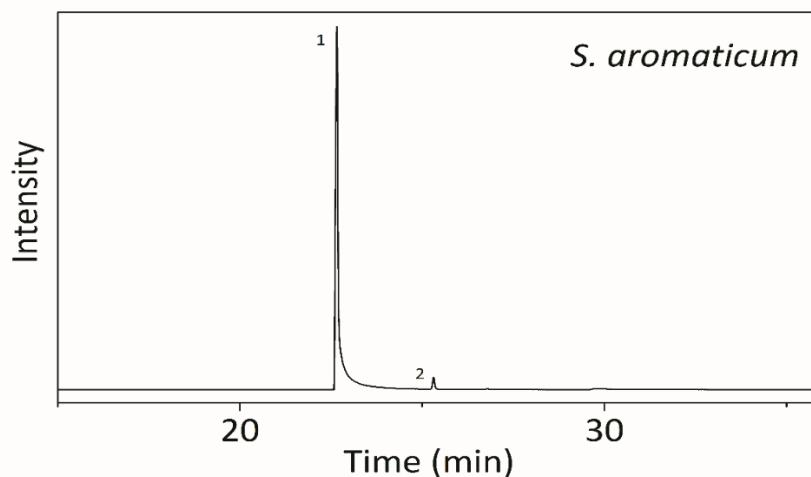

Figure S1. Gas chromatogram from the GC-MS of the *S. aromaticum* essential oil. Identification of peaks: <sup>1</sup> Eugenol, and <sup>2</sup> (E)  $\beta$ -ocimene.

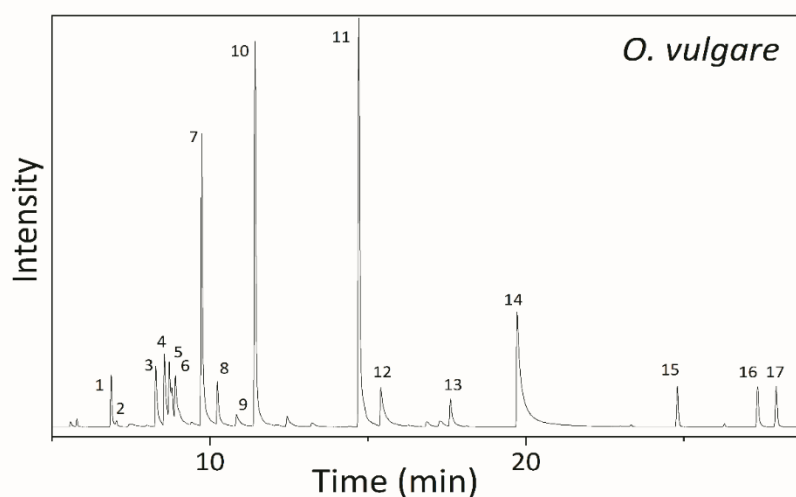

Figure S2. Gas chromatogram from the CG-MS of the *O. vulgare* essential oil. Identification of peaks: <sup>1</sup> Sabinene, <sup>2</sup>  $\beta$ -Pinene, <sup>3</sup>  $\alpha$ -Terpinene, <sup>4</sup> *p*-Cimene, <sup>5</sup> Limonene, <sup>6</sup> (E)  $\beta$ -Ocimene, <sup>7</sup>  $\gamma$ -Terpinene, <sup>8</sup> *Cis*-Sabinene hydrate, <sup>9</sup> Terpinolene, <sup>10</sup> *trans*-Sabinene hydrate, <sup>11</sup> Linalyl formate, <sup>12</sup> Terpinen-4-ol, <sup>13</sup>  $\alpha$ -Terpineol, <sup>14</sup> Linalyl acetate, <sup>15</sup> Carvacrol, <sup>16</sup>  $\gamma$ -Cadinene, <sup>17</sup> Bicyclogermacrene.

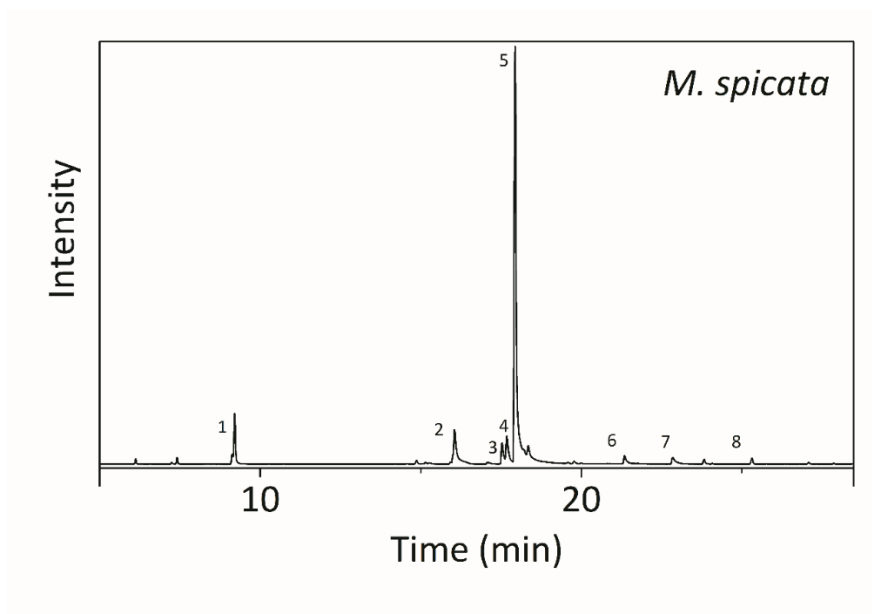

Figure S3. Gas chromatogram from the CG-MS of the *M. spicata* essential oil. Identification of peaks: <sup>1</sup> Eucalyptol, <sup>2</sup> Dihydrocarveol, <sup>3</sup> *trans*- Carveol, <sup>4</sup> Pulegone, <sup>5</sup> Carvone, <sup>6</sup> Heptylidene acetone, <sup>7</sup> Dihydrocarvyl Acetate, <sup>8</sup> *cis*-carveol.

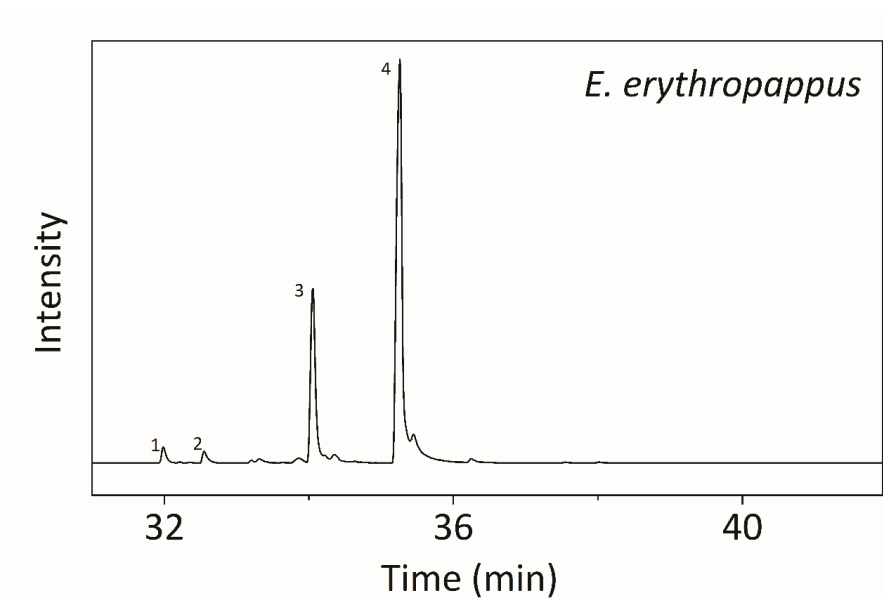

Figure S4. Gas chromatogram from the CG-MS of the *E. erythropappus* essential oil. Identification of peaks: <sup>1</sup> Caryophyllene oxide, <sup>2</sup> Spatulanol, <sup>3</sup>  $\alpha$ -bisabolol B oxide, <sup>4</sup>  $\alpha$ - bisabolol.

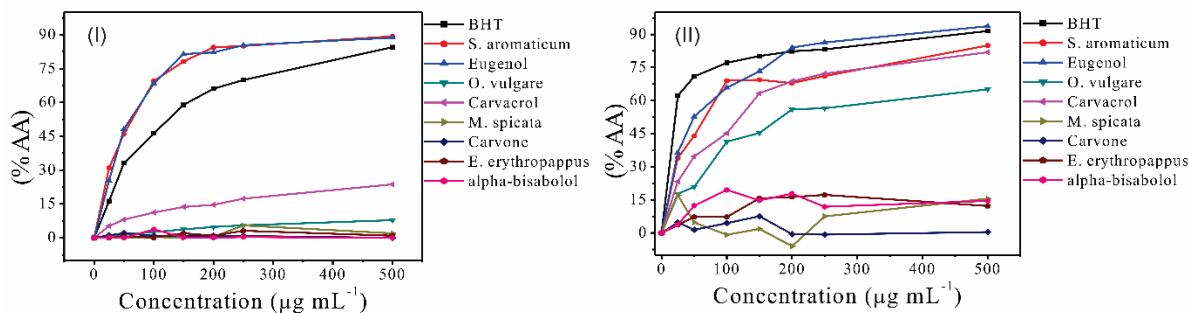

Figure S5. (I) Stabilization of DPPH radicals and (II) β-Carotene bleaching assay, % antioxidant activity (%AA). Exponential behavior of BHT, *S. aromaticum*, eugenol, carvacrol and *O. vulgare*.

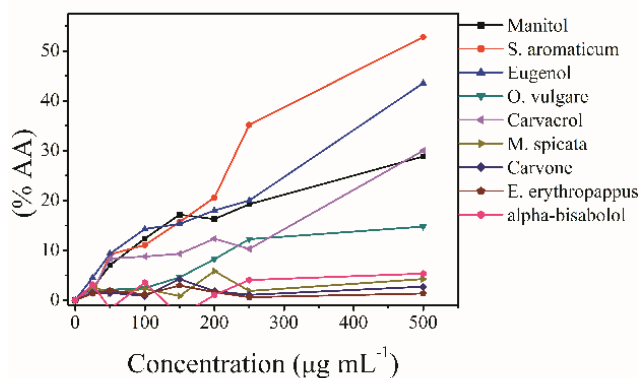

Figure S6. Behavior of essential oils and synthetic standards in deoxyribose degradation assay.

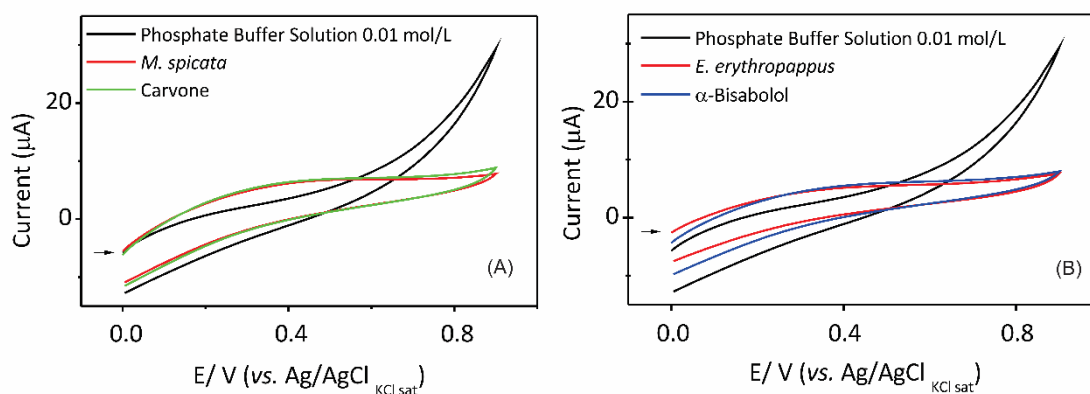

Figure 7S. Cyclic voltammograms obtained for (A) *M. spicata* and carvone, and (B) *E. erythropappus* and α-bisabolol, at the 500 µg L<sup>-1</sup> concentration, in 0.01 mol L<sup>-1</sup> phosphate buffer (pH 7.4).
